# Supplementary material for: Hygroscopic and phase transition properties of alkyl aminium sulfates at low relative humidities
Source: Royal Society of Chemistry journal article supplement (doi:10.1039/c5cp02404h), 2015-01-01
Supplement: c5cp02404h1.pdf [file c5cp02404h1.pdf]

**Electronic Supplementary Information (ESI)**

**Hygroscopic and phase transition properties of alkyl aminium sulfates  
at low relative humidities**

Yangxi Chu<sup>a</sup>, Meike Sauerwein<sup>a</sup> and Chak K. Chan<sup>a,b,\*</sup>

<sup>a</sup> *Division of Environment, The Hong Kong University of Science and Technology, Clear  
Water Bay, Kowloon, Hong Kong, China*

<sup>b</sup> *Department of Chemical and Biomolecular Engineering, The Hong Kong University of  
Science and Technology, Clear Water Bay, Kowloon, Hong Kong, China*

<sup>\*</sup> *Corresponding author: keckchan@ust.hk*

17

## Table of Contents

### 18 Table List and Caption

19 **Table S1.** A/S changes of TMAS particles upon dehumidification.

20

### 21 Figure List and Captions

22 **Figure S1.** Schematic of the experimental setup.

23 **Figure S2.** WSR–PR linear correlation of an examined MMAS (A/S=2.0) droplet.

24 **Figure S3.** Images of MMAS (A/S=2.0) particles undergoing (a) dehumidification and (b)  
25 humidification captured at the specific RH shown in the bottom right corner. Arrows  
26 indicate the chronological order of taking particle images during dehumidification and  
27 humidification.

28 **Figure S4.** Raman spectra of an MMAS (A/S=2.0) particle undergoing deliquescence at  
29  $43\pm 2\%$  RH recorded at three positions. Numbers in the particle image indicate the  
30 positions where the spectra were taken. Signals of the fluorocarbon substrate are shaded  
31 in grey.

32 **Figure S5.** Images of MEAS (A/S=2.0) particles undergoing (a) dehumidification and (b)  
33 humidification captured at the specific RH shown in the bottom right corner. Arrows  
34 indicate the chronological order of taking particle images during dehumidification and  
35 humidification.

36 **Figure S6.** Raman spectra of an MEAS (A/S=2.0) particle at different RH during  
37 humidification. Signals of the fluorocarbon substrate are shaded in grey.

38

39 **Table S1.**

| <b>Time (min)</b> | <b>RH (%)</b> | <b>A/S</b>  | <b>Accumulative TMA<br/>evaporation (%)</b> |
|-------------------|---------------|-------------|---------------------------------------------|
| 0                 | 96 ± 2        | 1.68 ± 0.03 |                                             |
| 117               | 55 ± 2        | 1.63 ± 0.03 | 3                                           |
| 177               | 24 ± 2        | 1.44 ± 0.02 | 14                                          |
| 240               | < 3           | 1.01 ± 0.02 | 40                                          |

40

41 **Figure S1.**

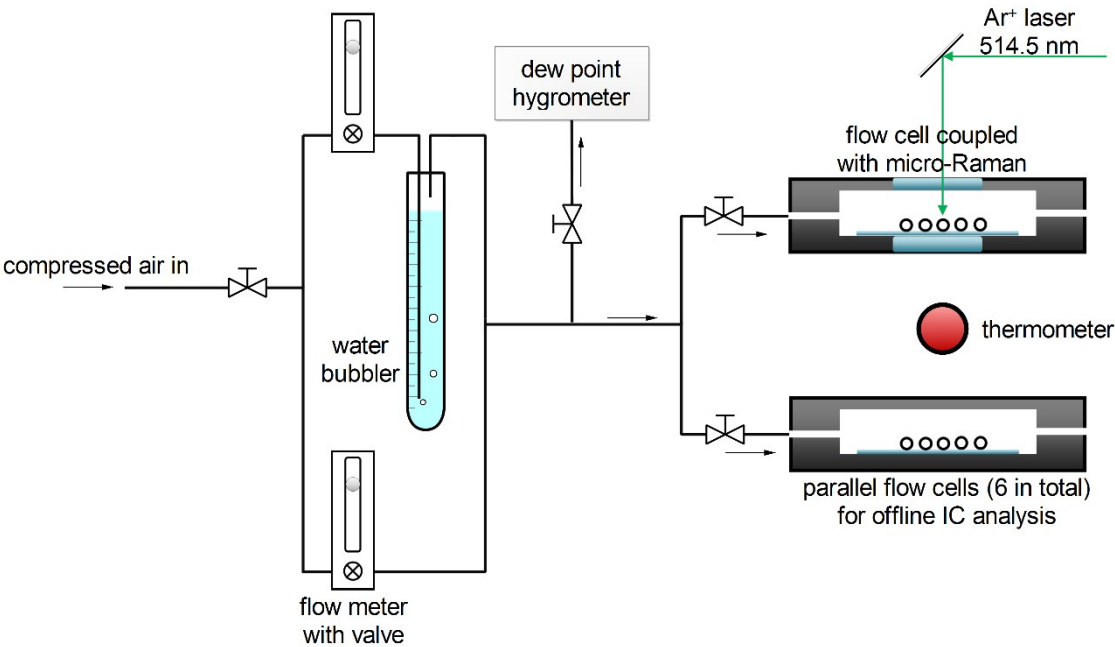

42

43

44 **Figure S2.**

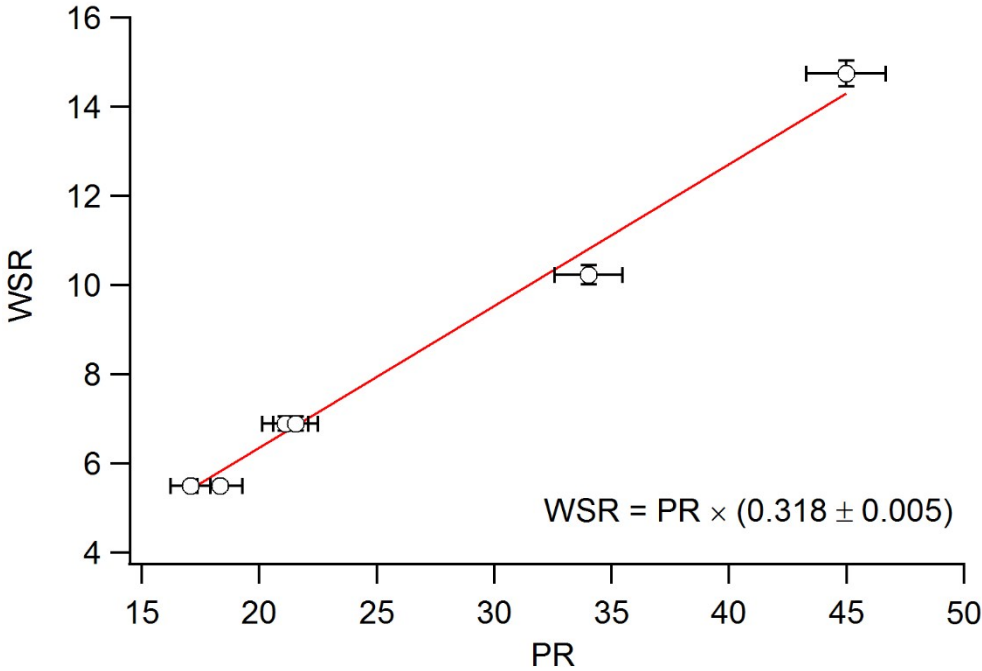

45

46

47 **Figure S3.**

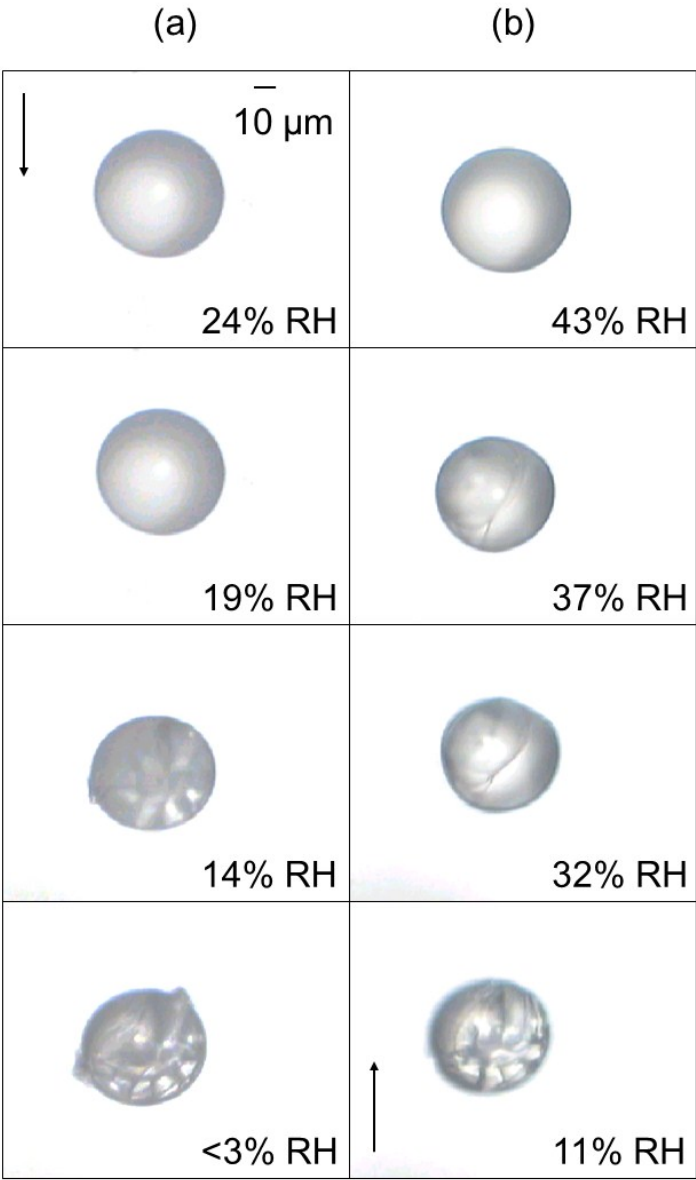

48

49

50 **Figure S4.**

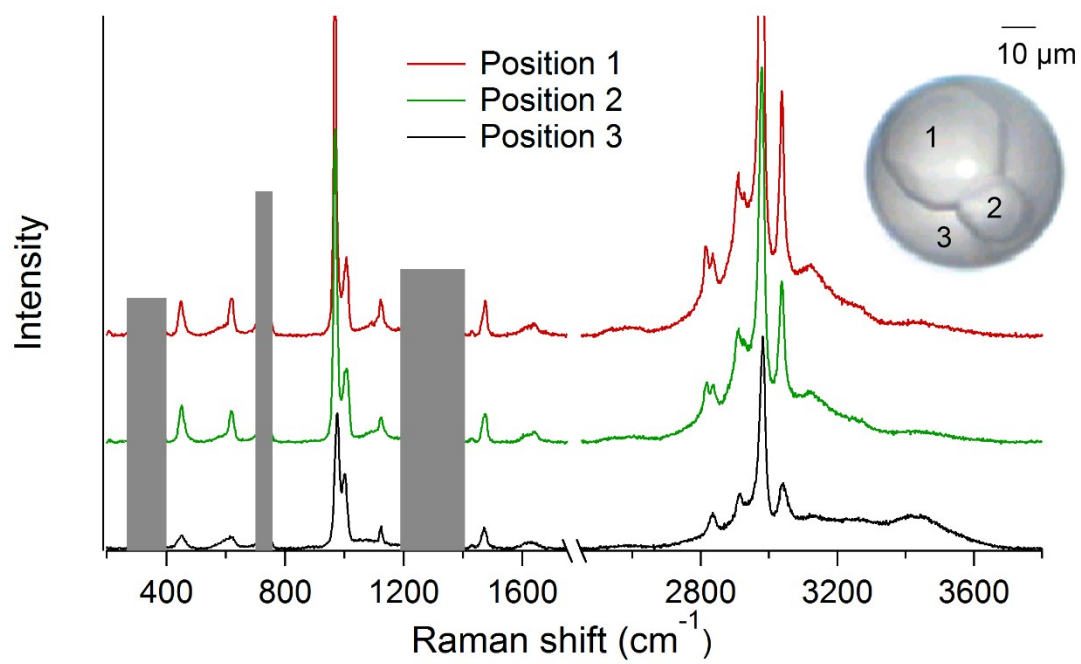

51

52

53 **Figure S5.**

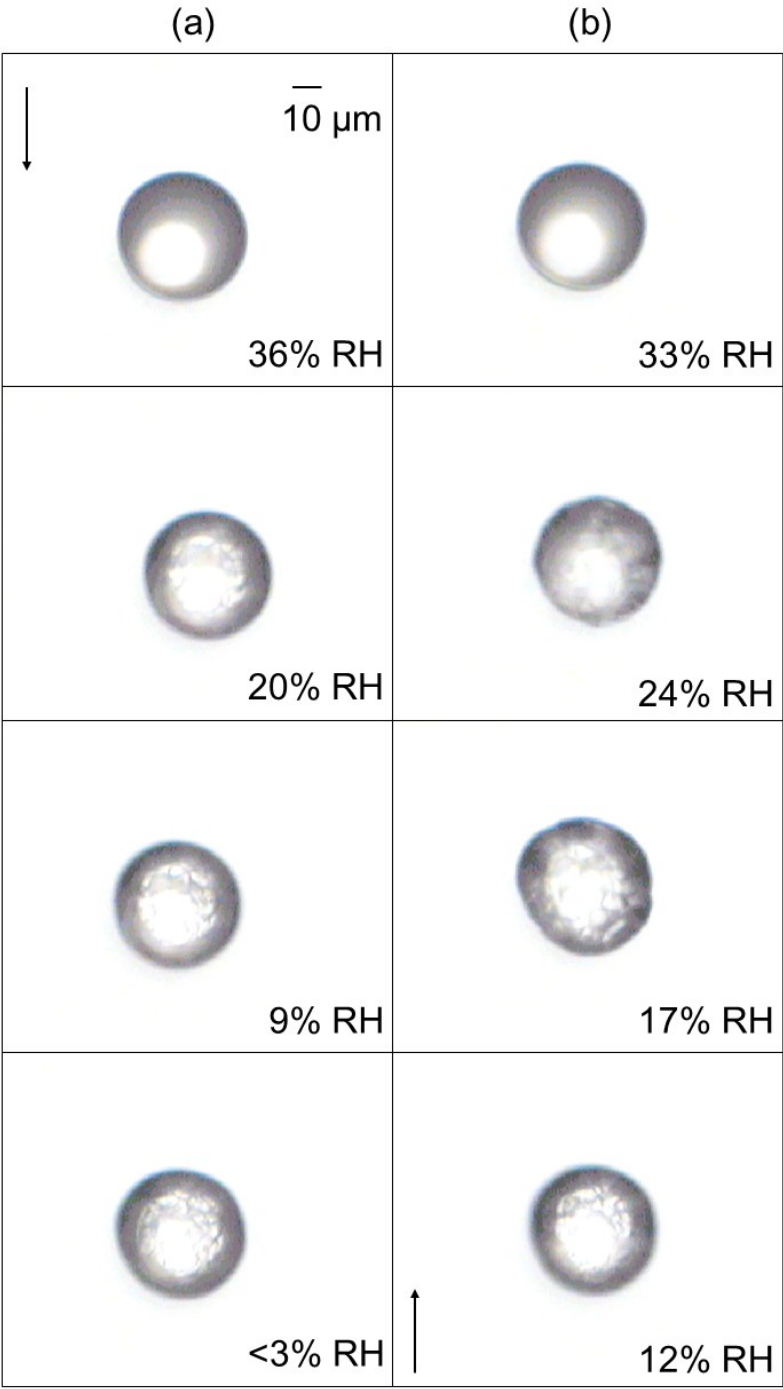

54

55

56 **Figure S6.**

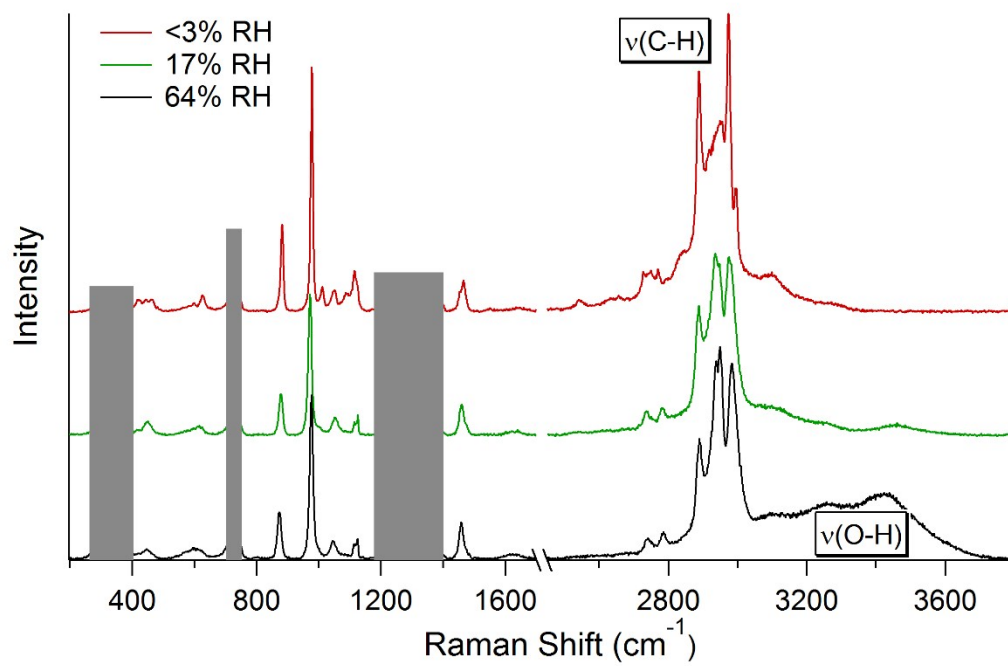

57

58
